# Supplementary material for: Dendritic nanostructured FeS2-based high stability and capacity Li-ion cathodes
Source: Royal Society of Chemistry journal article supplement (doi:10.1039/c8ra07606e), 2018-01-01
Supplement: c8ra07606e1.pdf [file c8ra07606e1.pdf]

## Supporting Information

### Dendritic Nanostructured FeS<sub>2</sub>-Based High Stability and Capacity Li-ion Cathodes

Zhenxing Yu, Junjie Wang, Na Zhang, Jungwoo Shin, Qiye Zheng, Subing Qu, Xiaoqing He, Angus Rockett, Hong Yang, Paul V. Braun\*

Z. Yu, J. Wang, J. Shin, Q. Zheng, S. Qu, X. He, Prof. Rockett and Prof. Braun.  
Department of Materials Science and Engineering, Materials Research Laboratory, and  
Beckman Institute for Advanced Science and Technology, University of Illinois at Urbana-  
Champaign, Urbana, Illinois 61801, United States  
E-mail: [pbraun@illinois.edu](mailto:pbraun@illinois.edu)

Z. Yu  
BGRIMM Technology Group, Beijing 100160, China.  
Beijing Easpring Materials Technology CO., LTD.

N. Zhang  
Beijing Aerospace Propulsion Institute, Beijing 100076, China.

N. Zhang and Prof. Yang  
Department of Chemical and Biomolecular Engineering, University of Illinois at  
Urbana-Champaign, Urbana, Illinois 61801, United States

Keywords: dendritic structure, pyrite, Li<sub>2-x</sub>FeS<sub>2</sub>, Li-ion Batteries

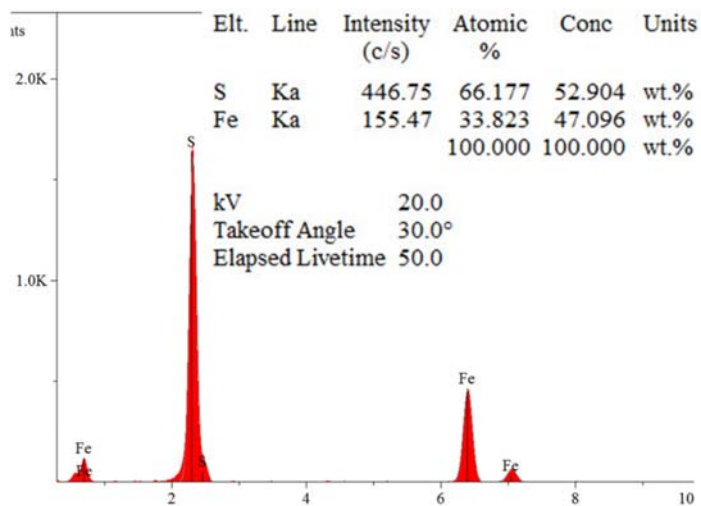

Figure S1. EDS obtained from the as-synthesized dendritic FeS<sub>2</sub>

**Table S1.** Electrochemical performance of this work and other FeS<sub>2</sub>-based Li-ion cathodes.

| Electrode                                              | Cut off voltage (V) | Capacity (mAh/g) | Cap. retention@50 cycles (%) |
|--------------------------------------------------------|---------------------|------------------|------------------------------|
| (PNA) -FeS <sub>2</sub> <sup>45</sup>                  | 1.0-3.0             | 729@0.1C         | 64                           |
| FeS <sub>2</sub> /TFPI-based IL <sup>39</sup>          | 1.0-3.0             | 610@0.1C         | >80                          |
| FeS <sub>2</sub> @C porous nanooctahedra <sup>37</sup> | 1.0-3.0             | 509@0.5C         | 90                           |
| FeS <sub>2</sub> nanowires <sup>38</sup>               | 1.1-2.4             | 409@0.1C         | 85                           |
| dendritic FeS <sub>2</sub> (this work)                 | 0.7-3.0             | 796@0.5C         | 70                           |
| dendritic FeS <sub>2</sub> (this work)                 | 0.7-2.4             | 491@0.5C         | 85                           |

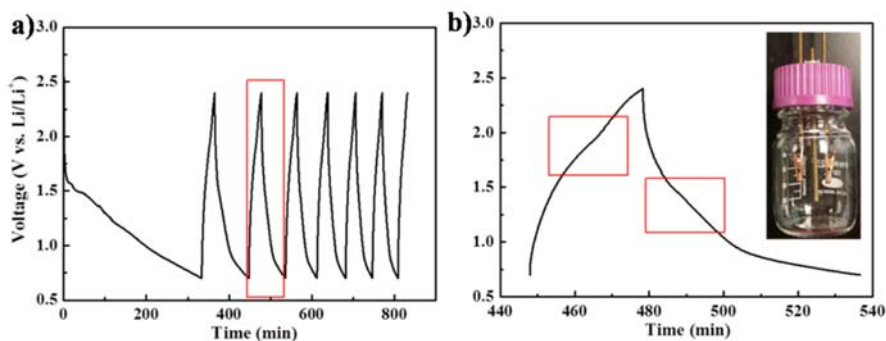

**Figure S2.** a) The voltage vs. time curve of the hierarchical dendritic FeS<sub>2</sub> cycled 7 times at about 0.2 C. b) The voltage vs. time curve of 2<sup>nd</sup> cycle. The insert is the bottle cell used for TEM sample cycling.

Figure S2b shows charging/discharging conversion plateaus, indicating that the lithium ion lithiation and delithiation proceeds. After 7 cycles, the dendritic samples on the copper grid were immediately characterized by TEM and HRTEM.

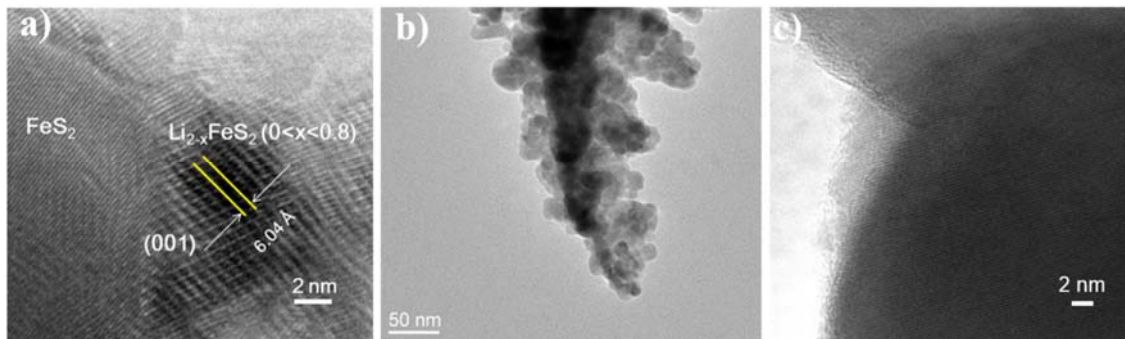

**Figure S3.** a) HRTEM image of dendritic FeS<sub>2</sub> after 7 cycles at about 0.2 C, b) TEM image of dendritic FeS<sub>2</sub> before cycling tests, and c) HRTEM image of dendritic FeS<sub>2</sub>.

HRTEM image of dendritic FeS<sub>2</sub> after 7 cycles at about 0.2 C in Figure S3a also shows a clear phase boundary between FeS<sub>2</sub> and Li<sub>2-x</sub>FeS<sub>2</sub> and lattice spacings of the (001) planes of the Li<sub>2</sub>FeS<sub>2</sub>. These HRTEM images also confirm the presence of Li<sub>2-x</sub>FeS<sub>2</sub> as an intermediate phase during cycling. TEM image of FeS<sub>2</sub> before cycling (Figure S3b) confirms the dendritic structure is present in the as-synthesized material. HRTEM image of an edge of the dendritic FeS<sub>2</sub> shows the lattice fringes of cubic FeS<sub>2</sub> (Figure S3c).

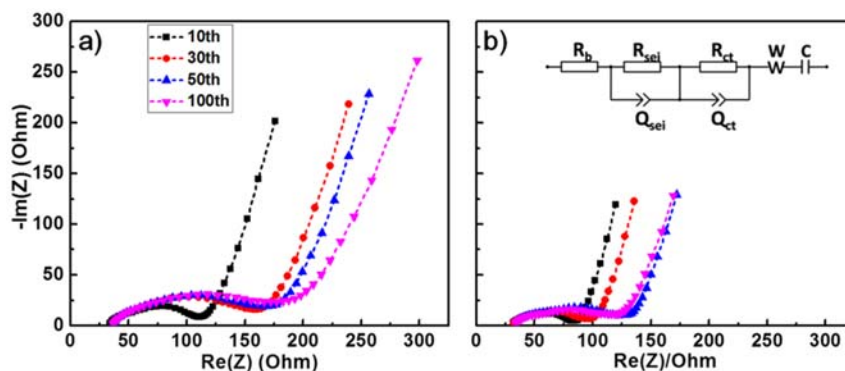

**Figure S4.** EIS of the dendritic FeS<sub>2</sub> composite electrode in a) FEC-free and b) 10 wt% FEC-containing electrolyte at room temperature.

**Table S2.** Fitted results from EIS in FEC-free and FEC-containing electrolyte.

| Cycle number | Electrolyte without FEC |                |               | Electrolyte + 10wt% FEC |                |               |
|--------------|-------------------------|----------------|---------------|-------------------------|----------------|---------------|
|              | $R_b$ /ohm              | $R_{sei}$ /ohm | $R_{ct}$ /ohm | $R_b$ /ohm              | $R_{sei}$ /ohm | $R_{ct}$ /ohm |
| 10           | 33.22                   | 66.41          | 11.00         | 29.83                   | 28.84          | 23.31         |
| 30           | 35.42                   | 96.96          | 20.07         | 29.70                   | 39.32          | 22.75         |
| 50           | 35.11                   | 102.9          | 19.53         | 31.03                   | 64.90          | 26.67         |
| 100          | 35.35                   | 121.6          | 20.02         | 31.00                   | 48.79          | 27.93         |

Electrochemical Impedance Spectroscopy (EIS) was used to study the electrode properties from 100 kHz to 10 mHz at room temperature; the results are shown in Figure S4 and Table S2. Figures S4a and S4b show EIS of the FeS<sub>2</sub> cathode discharged to 2.4 V in the electrolyte with and without FEC after increasing cycle numbers (cycled at 1C). The EIS curves can be analyzed using the equivalent circuit model included in Figure S4b.  $R_b$  represents the intercept on the  $Re(Z)$  axis, which comes from the resistance of the electrolyte, separator, and electrical contacts;  $R_{sei}$  corresponds to the depressed semicircle in the intermediate frequency range, which is related to the Li-ion migration resistance through the solid-electrolyte interphase (SEI) film formed on the electrode and/or another coating layer;  $R_{ct}$ , the second semicircle, indicates the faradic charge transfer resistance. The inclined line in the low frequency represents the Warburg impedance, which is associated with Li-ion diffusion in the FeS<sub>2</sub>.<sup>1</sup> The auto fit values of each element from the EC-lab software are given in Table S2. Both  $R_b$  and  $R_{ct}$  remain similar after adding 10 wt% FEC into the electrolyte. However,  $R_{sei}$  changes significantly. In the FEC-free electrolyte,  $R_{sei}$  is 66.41 ohm after 10<sup>th</sup> cycle, and increases quickly with the cycle number (121.6 ohm at the 100<sup>th</sup> cycle). This indicates that there is a continuously growing undesirable SEI layer on the cathode surface.  $R_{sei}$  in the FEC-containing electrolyte is 28.84 ohm at the 10<sup>th</sup> cycle, reaches 64.9 ohm at 50<sup>th</sup> cycle, and then is largely unchanged through at least the 100<sup>th</sup>

---

cycle, confirming that the added FEC contributes to forming a thinner and more stable SEI. A thin and stable SEI both enhances the cathode cycling performance, and probably helps to retain the dendritic FeS<sub>2</sub> structure.<sup>2,3</sup>

**References:**

1. H. C. Shin, W. I. Cho and H. Jang, *J. Power Sources*, 2006, **159**, 1383-1388.
2. V. Etacheri, O. Haik, Y. Goffer, G. A. Roberts, I. C. Stefan, R. Fasching and D. Aurbach, *Langmuir*, 2012, **28**, 965-976.
3. S. S. Zhang, *J. Power Sources*, 2006, **162**, 1379-1394.
